# Supplementary material for: The Use of Right Angle Fluorescence Spectroscopy to Distinguish the Botanical Origin of Greek Common Honey Varieties
Source: MDPI journal article supplement (doi:10.3390/app11094047), 2021-04-29
Supplement: s1 [file s1]

**Supplementary Table S2.** Results of melissopalynological analysis.

| Label | Botanical origin | HDE presence <sup>a</sup> | Pollen (%)                         |                           |                    |                     |
|-------|------------------|---------------------------|------------------------------------|---------------------------|--------------------|---------------------|
|       |                  |                           | <i>Castanea Mill.</i> <sup>b</sup> | <i>Erica</i> <sup>c</sup> | Thyme <sup>d</sup> | Citrus <sup>e</sup> |
| St1   | Thyme            |                           | n.d. <sup>f</sup>                  | n.d.                      | 19.6               | n.d.                |
| St2   | Thyme            |                           | n.d.                               | n.d.                      | 18.0               | n.d.                |
| St3   | Thyme            |                           | 12.1                               | n.d.                      | 31.6               | n.d.                |
| St4   | Thyme            |                           | n.d.                               | n.d.                      | 38.3               | n.d.                |
| St5   | Thyme            |                           | n.d.                               | n.d.                      | 29.8               | n.d.                |
| St6   | Thyme            |                           | n.d.                               | n.d.                      | 24.0               | n.d.                |
| St7   | Thyme            |                           | 12.8                               | n.d.                      | 25.6               | n.d.                |
| St8   | Thyme            |                           | n.d.                               | 4.2                       | 22.0               | n.d.                |
| St9   | Thyme            |                           | 16.5                               | 5.0                       | 48.5               | n.d.                |
| St10  | Thyme            |                           | 16.5                               | n.d.                      | 28.1               | n.d.                |
| St11  | Thyme            |                           | n.d.                               | n.d.                      | 38.8               | n.d.                |
| St12  | Thyme            |                           | n.d.                               | n.d.                      | 77.9               | n.d.                |
| St13  | Thyme            |                           | n.d.                               | 7.2                       | 29.7               | 2.2                 |
| St14  | Thyme            |                           | 10.5                               | n.d.                      | 25.1               | 2.4                 |
| St15  | Thyme            |                           | 24.8                               | 9.6                       | 25.1               | n.d.                |
| St16  | Thyme            |                           | 7.4                                | n.d.                      | 40.2               | n.d.                |
| St17  | Thyme            |                           | 10.2                               | n.d.                      | 37.1               | n.d.                |
| St18  | Thyme            |                           | 31.6                               | 7.4                       | 21.6               | n.d.                |
| St19  | Pine             | Important                 | 31.1                               | 6.8                       | n.d.               | n.d.                |
| St20  | Pine             | Important                 | 17.9                               | 6.0                       | 8.7                | n.d.                |
| St21  | Pine             | Important                 | n.d.                               | 1.1                       | 4.1                | n.d.                |
| St22  | Pine             | Important                 | 4.5                                | 10.6                      | n.d.               | n.d.                |
| St23  | Pine             | Important                 | 79.4                               | 0.6                       | n.d.               | n.d.                |
| St24  | Pine             | Important                 | 4.5                                | n.d.                      | 19.0               | n.d.                |
| St25  | Pine             | Important                 | 2.0                                | n.d.                      | 10.1               | n.d.                |
| St26  | Pine             | Important                 | 19.1                               | 8.8                       | n.d.               | n.d.                |
| St27  | Pine             | Important                 | 7.0                                | n.d.                      | n.d.               | n.d.                |
| St28  | Pine             | Important                 | 22.6                               | 28.8                      | n.d.               | n.d.                |
| St29  | Pine             | Important                 | n.d.                               | n.d.                      | 4.8                | n.d.                |
| St30  | Pine             | Important                 | n.d.                               | n.d.                      | n.d.               | n.d.                |
| St31  | Pine             | Important                 | 36.9                               | n.d.                      | n.d.               | n.d.                |
| St32  | Fir              | Small                     | 2.9                                | n.d.                      | n.d.               | n.d.                |
| St33  | Fir              | Small                     | 17.5                               | n.d.                      | n.d.               | n.d.                |
| St34  | Fir              | Small                     | 45.7                               | 15.4                      | n.d.               | n.d.                |
| St35  | Fir              | Small                     | n.d.                               | n.d.                      | n.d.               | n.d.                |
| St36  | Fir              | Small                     | 40.9                               | n.d.                      | n.d.               | n.d.                |

|      |        |           |      |      |      |      |
|------|--------|-----------|------|------|------|------|
| St37 | Fir    | Small     | n.d. | n.d. | n.d. | n.d. |
| St38 | Fir    | Small     | 9.5  | n.d. | n.d. | n.d. |
| St39 | Fir    | Small     | 19.0 | n.d. | n.d. | n.d. |
| St40 | Fir    | Small     | n.d. | 10.1 | n.d. | n.d. |
| St41 | Fir    | Small     | n.d. | n.d. | n.d. | n.d. |
| St42 | Fir    | Small     | n.d. | 0.7  | n.d. | n.d. |
| St43 | Fir    | Small     | n.d. | n.d. | 18.4 | n.d. |
| St44 | Fir    | Small     | n.d. | 7.0  | n.d. | n.d. |
| St45 | Fir    | Small     | 39.8 | n.d. | n.d. | n.d. |
| St46 | Fir    | Small     | 6.4  | 10.1 | n.d. | n.d. |
| St47 | Fir    | Small     | 25.6 | 26.1 | n.d. | n.d. |
| St48 | Citrus |           | 7.9  | n.d. | n.d. | 5.3  |
| St49 | Citrus |           | 29.6 | n.d. | n.d. | 8.1  |
| St50 | Citrus |           | n.d. | n.d. | n.d. | 4.5  |
| St51 | Citrus |           | n.d. | n.d. | n.d. | 12.3 |
| St52 | Citrus |           | n.d. | n.d. | n.d. | 7.1  |
| St53 | Citrus |           | 18.8 | n.d. | n.d. | 3.2  |
| St54 | Citrus |           | n.d. | n.d. | n.d. | 3.7  |
| St55 | Citrus |           | n.d. | n.d. | n.d. | 7.5  |
| St56 | Citrus |           | 16.3 | 3.5  | n.d. | 6.7  |
| St57 | Citrus |           | n.d. | 8.2  | n.d. | 3.0  |
| St58 | Citrus |           | n.d. | n.d. | n.d. | 4.4  |
| St59 | Citrus |           | n.d. | 6.0  | n.d. | 6.0  |
| T1   | Thyme  |           | 8.0  | n.d. | 21.4 | n.d. |
| T2   | Thyme  |           | 12.9 | n.d. | 26.6 | n.d. |
| T3   | Thyme  |           | 23.9 | n.d. | 20.4 | n.d. |
| T4   | Thyme  |           | n.d. | n.d. | 18.7 | n.d. |
| T5   | Thyme  |           | n.d. | n.d. | 49.2 | n.d. |
| T6   | Thyme  |           | n.d. | n.d. | 37.5 | n.d. |
| T7   | Thyme  |           | n.d. | n.d. | 19.0 | n.d. |
| T8   | Thyme  |           | 31.7 | 2.6  | 27.8 | n.d. |
| T9   | Thyme  |           | n.d. | 1.2  | 18.6 | n.d. |
| T10  | Thyme  |           | n.d. | n.d. | 34.3 | n.d. |
| T11  | Thyme  |           | n.d. | n.d. | 44.7 | n.d. |
| T12  | Thyme  |           | 19.5 | n.d. | 29.5 | n.d. |
| T13  | Thyme  |           | 3.4  | 3.5  | 18.3 | n.d. |
| T14  | Thyme  |           | n.d. | n.d. | 18.9 | n.d. |
| T15  | Pine   | Important | 3.9  | 2.5  | n.d. | n.d. |
| T16  | Pine   | Important | n.d. | 4.8  | 5.9  | n.d. |
| T17  | Pine   | Important | 9.4  | n.d. | 6.3  | n.d. |

|     |        |           |      |      |      |      |
|-----|--------|-----------|------|------|------|------|
| T18 | Pine   | Important | 32.0 | n.d. | 6.4  | n.d. |
| T19 | Pine   | Important | 13,7 | 29.9 | n.d. | n.d. |
| T20 | Fir    | Small     | 65.2 | n.d. | n.d. | n.d. |
| T21 | Fir    | Small     | n.d. | 6.0  | n.d. | n.d. |
| T22 | Fir    | Small     | 44.6 | n.d. | n.d. | n.d. |
| T23 | Fir    | Small     | n.d. | n.d. | n.d. | n.d. |
| T24 | Fir    | Small     | n.d. | n.d. | n.d. | n.d. |
| T25 | Citrus |           | n.d. | n.d. | n.d. | 3.9  |
| T26 | Citrus |           | n.d. | n.d. | n.d. | 8.7  |
| T27 | Citrus |           | n.d. | n.d. | n.d. | 5.0  |
| T28 | Citrus |           | n.d. | n.d. | n.d. | 11.6 |

<sup>a</sup>Honeydew elements; <sup>b</sup>Castanea pollen grains  $\geq 87\%$ ; <sup>c</sup>Erica pollen grains  $\geq 45\%$ ; <sup>d</sup>Thyme pollen grains  $\geq 18\%$ , and at the same time the percentage of pollen grains of other plant species does not exceed 45%; <sup>e</sup>Citrus pollen grains  $\geq 3\%$ ; <sup>f</sup>not detected.
