# Supplementary material for: The Use of Right Angle Fluorescence Spectroscopy to Distinguish the Botanical Origin of Greek Common Honey Varieties
Source: MDPI journal article supplement (doi:10.3390/app11094047), 2021-04-29
Supplement: s1 [file s1]

**Supplementary Table S1.** The structure of the standard's phenolic compounds.

| Phenolic compound | Structure of compound                                                                |
|-------------------|--------------------------------------------------------------------------------------|
| Caffeic acid      | 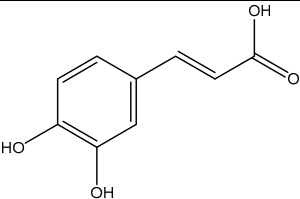   |
| Chlorogenic acid  |    |
| p-Coumaric acid   |    |
| Ferulic acid      |   |
| Sinapic acid      |  |
| Ellagic acid      |  |
| Honogentisic acid |  |

|                     |                                                                                      |
|---------------------|--------------------------------------------------------------------------------------|
| Gallic acid         | 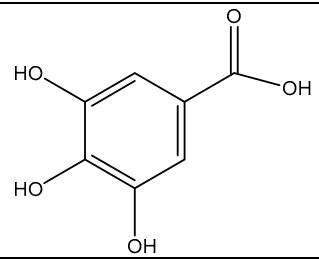   |
| Protocatechuic acid |    |
| Syringic acid       |   |
| Vanillic acid       |  |
| Methyl syringate    |  |
| Gentisic acid       |  |
| Keampferol          |  |

|             |                                                                                      |
|-------------|--------------------------------------------------------------------------------------|
| Catechin    | 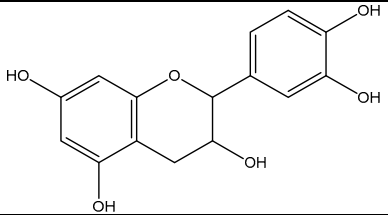   |
| Chrysin     |    |
| Hesperitin  |    |
| Isohamentin |   |
| Narigenin   |  |
